# Supplementary material
Source: PubMed Central journal article supplement (PMC4818565)
Supplement: supp_WNL.0000000000002517_3.29.16_Hostile_attitudes_and_effortful_coping.pdf [file supp_WNL.0000000000002517_3.29.16_Hostile_attitudes_and_effortful_coping.pdf]

## Hostile attitudes and effortful coping in young adulthood predict cognition 25 years later

المواقف العدائية وصعوبة التكيف عند الشباب البالغين ينبئان الإدراك بعد 25 سنة

**الهدف :** درسنا العلاقة بين وظيفة الإدراك في عمر مبكر (متوسط العمر 25 عاما) وفي منتصف العمر (متوسط العمر 50 عاما) مع القياسات المبكرة للمواقف العدائية و effortful coping.

**طريقة البحث :** درسنا 3126 رجل وامرأة بيض وسود (مواليد 1955-1968) اختيروا من دراسة خطر تطور مرض الشرايين التاجية عند الشباب البالغين (CARDIA). استخدمنا الانحدار الخطي لدراسة ارتباط المواقف العدائية (استبيان Cook-Medley) و صعوبة التكيف الذي تم تقييمه خلال عامي (1985-1986) مع القدرة المعرفية التي قيست في عام 1987 والى مركب مقياس Z المعرفي لاختبار الذاكرة اللفظية و السرعة الحركية النفسية والوظيفة النفسية المحققة في منتصف العمر (2010-2011).

**النتائج:** ارتبط السلوك العدائي الاساسي وصعوبة التكيف بشكل مستقبلي مع انخفاض الوظيفة الإدراكية بعد 25 عاما. وذلك بعد التحكم بكل من العمر, الجنس, العرق, التعليم, التعرض الطويل الأمد للاكتئاب, التمييز, أحداث الحياة السلبية, والقدرة المعرفية الأساسية. ومقارنة مع الربع الأدنى, فإن أولئك الذين هم في الربع الأعلى للسلوك العدائي حصلوا 0.21 وحدة SD أقل (معدل ثقة 95% 0.02-0.39). أما أولئك الذين هم في الربع الأعلى لل effortful coping حصلوا على 0.30 وحدة SD أقل (معدل ثقة 95% 0.12-0.48) مقارنة بالآخرين الذين هم في الربع الأدنى. ان المزيد من تعديل التعرض التراكمي لعوامل الخطر الوعائية القلبية أضعف ارتباط مركب مقياس Z المعرفي لقياس العدائية.

**الاستنتاجات:** ارتبط أسوأ الإدراك في منتصف العمر بشكل مستقل مع اثنين من الخصائص النفسية التي قيست في مرحلة الشباب. وهذا يشير إلى أن التدخلات التي تعزز التفاعلات الاجتماعية الإيجابية قد يكون لها دور في الحد من خطر اضطراب الوظيفة الإدراكية في وقت متأخر.

**Objectives:** We studied the relation of early-life (mean age 25 years) and mid-life (mean age 50 years) cognitive function to early measures of hostile attitudes and effortful coping

**Methods:** In 3,126 black and white men and women (born in 1955–1968) from the Coronary Artery Risk Development in Young Adults Study (CARDIA), we used linear regression to examine the association of hostile attitudes (Cook–Medley questionnaire) and effortful coping assessed at baseline (1985–1986) to cognitive ability measured in 1987 and to a composite cognitive Z score of tests of verbal memory, psychomotor speed, and executive function ascertained in midlife (2010–2011).

**Results:** Baseline hostility and effortful coping were prospectively associated with lower cognitive function 25 years later, controlling for age, sex, race, education, long-term exposure to depression, discrimination, negative life events, and baseline cognitive ability. Compared to the lowest quartile, those in the highest quartile of hostility performed 0.21 SD units lower (95% confidence interval [CI] –0.39, –0.02). Those in the highest quartile of effortful coping performed 0.30 SD units lower (95% CI –0.48, –0.12) compared to those in the lowest quartile. Further adjustment for cumulative exposure to cardiovascular risk factors attenuated the association with the cognitive composite Z score for hostility.

**Conclusions:** Worse cognition in midlife was independently associated with 2 psychological characteristics measured in young adulthood. This suggests that interventions that promote positive social interactions may have a role in reducing risk of late-age cognitive impairment.

---

**Translator:** Jan Bittar MD, Faculty of Medicine, University of Tishreen, Latakia, Syria

**Translation Reviewer:** Mohamed Kazamel MD, Department of Neurology, University of Alabama at Birmingham, AL
