# Supplementary material
Source: PubMed Central journal article supplement (PMC4818565)
Supplement: supp_WNL.0000000000002517_Figure_e-1.pdf [file supp_WNL.0000000000002517_Figure_e-1.pdf]

**Figure e-1** Mirror-tracing star task.

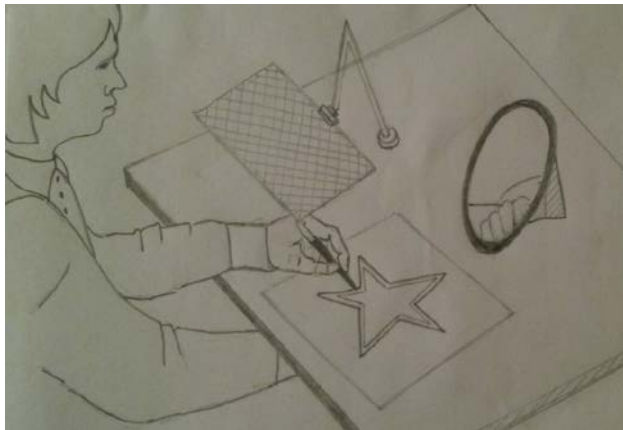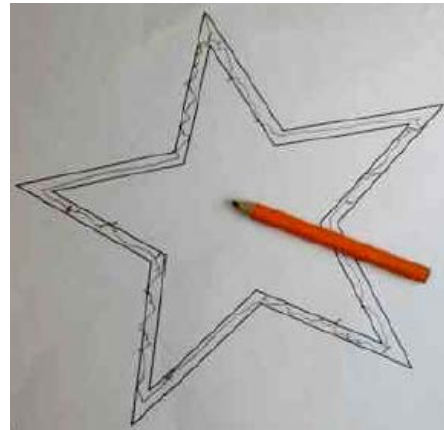

The subject moves the pencil to trace the diagram of a star, trying to stay between the double lines and keeping the line continuous, while looking at her/his hand only as a reflection in a mirror, a cardboard blocking their direct view.

The score is the total number of stars completed in three minutes. This task encompasses a broad array of cognitive domains including working memory, attention, psychomotor speed, concentration and executive function. The use of a mirror requires the inhibition of existing proprioceptive associations between vision and motor control of hand/ arm movements to actually learn a new fine motor skill to trace star diagrams.
