# Supplementary material
Source: PubMed Central journal article supplement (PMC4818565)
Supplement: supp_WNL.0000000000002517_Tables.pdf [file supp_WNL.0000000000002517_Tables.pdf]

**Table e-1** Association of hostility and effortful coping (Year 0, 1985-86) with cognitive function in mid-life (Year 25, 2010-11) adjusted for baseline cognitive ability (i.e. ‘mirror-tracing star’ test score) (Year 2, 1987-88); the CARDIA Study (n = 2,863).

| Quartiles               |     |      | Model 1   |              | Model 2   |              | Model 3   |              | Model 4   |              |
|-------------------------|-----|------|-----------|--------------|-----------|--------------|-----------|--------------|-----------|--------------|
|                         | N   | %    | $\beta^*$ | 95% CI       |
| <b>Hostility</b>        |     |      |           |              |           |              |           |              |           |              |
| 1 low (reference)       | 822 | 26.3 | 1         |              | 1         |              | 1         |              | 1         |              |
| 2 mid-low               | 806 | 25.8 | -0.13     | -0.32, 0.06  | 0.02      | -0.16, 0.20  | 0.02      | -0.16, 0.20  | 0.03      | -0.15, 0.21  |
| 3 mid-high              | 745 | 23.8 | -0.27     | -0.47, -0.07 | 0.01      | -0.18, 0.20  | 0.01      | -0.18, 0.20  | 0.04      | -0.15, 0.23  |
| 4 high                  | 753 | 24.1 | -0.57     | -0.77, -0.37 | -0.16     | -0.35, 0.03  | -0.15     | -0.35, 0.04  | -0.11     | -0.30, 0.08  |
| <b>Effortful coping</b> |     |      |           |              |           |              |           |              |           |              |
| 1 low (reference)       | 882 | 28.2 | 1         |              | 1         |              | 1         |              | 1         |              |
| 2 mid-low               | 822 | 24.3 | 0.03      | -0.16, 0.22  | -0.05     | -0.23, 0.13  | -0.05     | -0.23, 0.13  | -0.06     | -0.24, 0.12  |
| 3 mid-high              | 775 | 26.8 | 0.11      | -0.08, 0.30  | 0.01      | -0.16, 0.19  | 0.01      | -0.17, 0.18  | 0.01      | -0.16, 0.19  |
| 4 high                  | 647 | 20.7 | -0.21     | -0.42, -0.01 | -0.29     | -0.48, -0.10 | -0.29     | -0.49, -0.10 | -0.30     | -0.49, -0.11 |

Abbreviations: CARDIA, Coronary Artery Risk Development in Young Adults; CI, Confidence Intervals.

\*Linear regression coefficients (95% confidence intervals) representing difference in cognitive function (expressed in SD units) by personality trait score compared to lowest level.

Model 1 is adjusted for age, race and sex

Model 2 is further adjusted for depression at 2010 and educational achievement

Model 3 is further adjusted for lifelong scores of depressive symptomatology, and discrimination

Model 4 is further adjusted for smoking habit and alcohol consumption at year 25 and for lifelong scores of cardiovascular risk factors.

All models are adjusted for ‘mirror-tracing star’ test score obtained at year 2 (1987) asking participants to draw star diagrams within narrow boundary while looking at their hands only as a reflection in a mirror (**e-Figure 1**).

CVRF scores include scores of: obesity, high BP, diabetes, calculated as the sum of dichotomous (1/0) variables at each of the eight CARDIA follow-ups from 1985 to 2010.

Scores for depression are based on positive depressive symptomatology (CES-D score  $\geq 16$ ) (1/0) at follow-ups 7, 15, 20 and 25. Discrimination scores are based on measures at follow-ups 7, 15 and 25.

**Table e-2** Association of hostility (A) and effortful coping (B) (Year 0, 1985-86) with cognitive function in mid-life (Year 25, 2010-11). Comparisons Between Un-weighted and Weighted Models (Using IPCW); the CARDIA Study (n=3,126).

**A. Hostility**

| Quartiles                     |     |      | Model 1   |              | Model 2   |              | Model 3   |              | Model 4   |             |
|-------------------------------|-----|------|-----------|--------------|-----------|--------------|-----------|--------------|-----------|-------------|
|                               | N   | %    | $\beta^*$ | 95% CI       | $\beta^*$ | 95% CI       | $\beta^*$ | 95% CI       | $\beta^*$ | 95% CI      |
| <b>Main models</b>            |     |      |           |              |           |              |           |              |           |             |
| 1 low (reference)             | 822 | 26.3 | 1         |              | 1         |              | 1         |              | 1         |             |
| 2 mid-low                     | 806 | 25.8 | -0.13     | -0.31, 0.06  | 0.01      | -0.16, 0.19  | 0.01      | -0.16, 0.19  | 0.02      | -0.15, 0.20 |
| 3 mid-high                    | 745 | 23.8 | -0.34     | -0.53, -0.15 | -0.05     | -0.23, 0.13  | -0.05     | -0.23, 0.13  | -0.02     | -0.20, 0.16 |
| 4 high                        | 753 | 24.1 | -0.66     | -0.85, -0.47 | -0.22     | -0.40, -0.03 | -0.21     | -0.39, -0.02 | -0.16     | -0.35, 0.02 |
| <b>Weighted models (IPCW)</b> |     |      |           |              |           |              |           |              |           |             |
| 1 low (reference)             | 822 | 26.3 | 1         |              | 1         |              | 1         |              | 1         |             |
| 2 mid-low                     | 806 | 25.8 | -0.15     | -0.33, 0.04  | -0.02     | -0.2, 0.16   | -0.02     | -0.19, 0.16  | -0.01     | -0.19, 0.16 |
| 3 mid-high                    | 745 | 23.8 | -0.30     | -0.49, -0.11 | -0.05     | -0.23, 0.14  | -0.04     | -0.22, 0.15  | -0.01     | -0.20, 0.17 |
| 4 high                        | 753 | 24.1 | -0.56     | -0.76, -0.35 | -0.18     | -0.38, 0.02  | -0.16     | -0.37, 0.04  | -0.12     | -0.33, 0.08 |

**B. Effortful Coping**

| Quartiles                     |     |      | Model 1   |              | Model 2   |              | Model 3   |              | Model 4   |              |
|-------------------------------|-----|------|-----------|--------------|-----------|--------------|-----------|--------------|-----------|--------------|
|                               | N   | %    | $\beta^*$ | 95% CI       |
| <b>Main models</b>            |     |      |           |              |           |              |           |              |           |              |
| 1 low (reference)             | 882 | 28.2 | 1         |              | 1         |              | 1         |              | 1         |              |
| 2 mid-low                     | 822 | 24.3 | 0.05      | -0.14, 0.23  | -0.04     | -0.21, 0.13  | -0.05     | -0.22, 0.13  | -0.06     | -0.23, 0.11  |
| 3 mid-high                    | 775 | 26.8 | 0.12      | -0.06, 0.30  | 0.02      | -0.15, 0.19  | 0.01      | -0.16, 0.18  | 0.02      | -0.15, 0.19  |
| 4 high                        | 647 | 20.7 | -0.23     | -0.42, -0.03 | -0.30     | -0.48, -0.12 | -0.30     | -0.48, -0.12 | -0.30     | -0.48, -0.12 |
| <b>Weighted models (IPCW)</b> |     |      |           |              |           |              |           |              |           |              |
| 1 low (reference)             | 882 | 28.2 | 1         |              | 1         |              | 1         |              | 1         |              |
| 2 mid-low                     | 822 | 24.3 | -0.01     | -0.2, 0.18   | -0.07     | -0.25, 0.11  | -0.08     | -0.26, 0.10  | -0.09     | -0.27, 0.09  |
| 3 mid-high                    | 775 | 26.8 | 0.11      | -0.08, 0.30  | 0.01      | -0.17, 0.19  | 0.00      | -0.18, 0.18  | 0.00      | -0.18, 0.19  |
| 4 high                        | 647 | 20.7 | -0.16     | -0.37, 0.04  | -0.24     | -0.44, -0.05 | -0.25     | -0.44, -0.06 | -0.25     | -0.45, -0.06 |

Abbreviations: CARDIA, Coronary Artery Risk Development in Young Adults; CI, Confidence Intervals; IPCW, inverse-probability censoring weights.

\*Linear regression coefficients (95% confidence intervals) representing difference in cognitive function (expressed in SD units) by personality trait score compared to lowest level.

Model 1 is adjusted for age, race and sex

Model 2 is further adjusted for depression at 2010 and educational achievement

Model 3 is further adjusted for lifelong scores of depressive symptomatology, and discrimination

Model 4 is further adjusted for smoking habit and alcohol consumption at year 25 and for lifelong scores of cardiovascular risk factors.

CVRF scores include scores of: obesity, high BP, diabetes, calculated as the sum of dichotomous (1/0) variables at each of the eight CARDIA follow-ups from 1985 to 2010. Scores for depression are based on positive depressive symptomatology (CES-D score  $\geq 16$ ) (1/0) at follow-ups 7, 15, 20 and 25. Discrimination scores are based on measures at follow-ups 7, 15 and 25.
